# Supplementary material for: Micro- and nanoplastic transfer in freezing saltwater: implications for their fate in polar waters
Source: Royal Society of Chemistry journal article supplement (doi:10.1039/d1em00280e), 2021-01-01
Supplement: d1em00280e1.pdf [file d1em00280e1.pdf]

**Supplementary Information for: Micro- and nanoplastics' transfer in freezing saltwater:  
Implications for their fate in polar waters**

Pradel Alice<sup>1,2</sup>, Gautier Maud<sup>1</sup>, Bavay Dominique<sup>1</sup>, Gigault Julien<sup>1,2</sup>

<sup>1</sup> Univ Rennes, CNRS, Géosciences Rennes - UMR 6118, 35000 Rennes, France

<sup>2</sup> TAKUVIK, CNRS, Université Laval – UM I3376, Quebec, Canada

**Table of Contents:**

|                                                                                                                                                                                                                                                                                         |       |
|-----------------------------------------------------------------------------------------------------------------------------------------------------------------------------------------------------------------------------------------------------------------------------------------|-------|
| Table S1: Concentration of stock solutions or stock dispersions                                                                                                                                                                                                                         | p.1   |
| Figure S1: Steps of the progressive and partial freezing protocol                                                                                                                                                                                                                       | p.2   |
| Figure S2: Examples of time-lapse photography                                                                                                                                                                                                                                           | p.3   |
| Figure S3: a) Dimensions of the system in mm (not to scale) b) Evolution of the distribution of water between liquid and solid phases (m/m)                                                                                                                                             | p.3   |
| Table S2: Summary of the masses and concentrations of water, NaCl, micro- and nanoplastics and SA in the initial solution, liquid and ice recovered from the freezing reactor                                                                                                           | p.6-7 |
| Figure S4: TEM images of a) nPSL-200, b) nPS-360, and c) digital photography of $\mu$ PS                                                                                                                                                                                                | p.4   |
| Figure S5: Zeta potential of 10 mg kg <sup>-1</sup> of nanoplastic (nP) models in 4 mmol kg <sup>-1</sup> NaCl, alone and with 50 mg kg <sup>-1</sup> sodium alginate (SA)                                                                                                              | p.5   |
| Figure S6: Variations of size of nanoplastics (nPs) after bulk freeze/thaw a) as a function of NaCl concentration and b) as a function sodium alginate (SA)                                                                                                                             | p.5   |
| Figure S7: Logarithm of the partition coefficient between ice and liquid phase ( $C_{ice}/C_{liquid}$ ) of nanoplastic nPSL-200 and sodium alginate (SA), dispersed in deionized water at pH 8 or NaCl 35 g kg <sup>-1</sup> pH 8, as a function of duration of the freezing experiment | p.8   |
| Figure S8: Variation of the concentrations of different species in liquid and ice, as a function of the duration of the freezing in the reactor                                                                                                                                         | p.8   |
| Figure S9: Variation of the concentration of polystyrene microplastics ( $\mu$ PS) dispersed in 35 g kg <sup>-1</sup> NaCl at pH 8, and recovered in liquid and ice, as a function of the duration of freezing in the reactor                                                           | p.8   |

*Table 1: Concentration of stock solutions or stock dispersions*

| Stock solution or dispersion | Concentration                    |
|------------------------------|----------------------------------|
| NaCl                         | 100 g kg <sup>-1</sup>           |
| SA                           | $\approx 1$ g kg <sup>-1</sup>   |
| nPSL-200                     | 100 mg kg <sup>-1</sup>          |
| nPSL-350                     | 100 mg kg <sup>-1</sup>          |
| nPS-360                      | $\approx 40$ mg kg <sup>-1</sup> |
| $\mu$ PS                     | 4.25 g kg <sup>-1</sup>          |

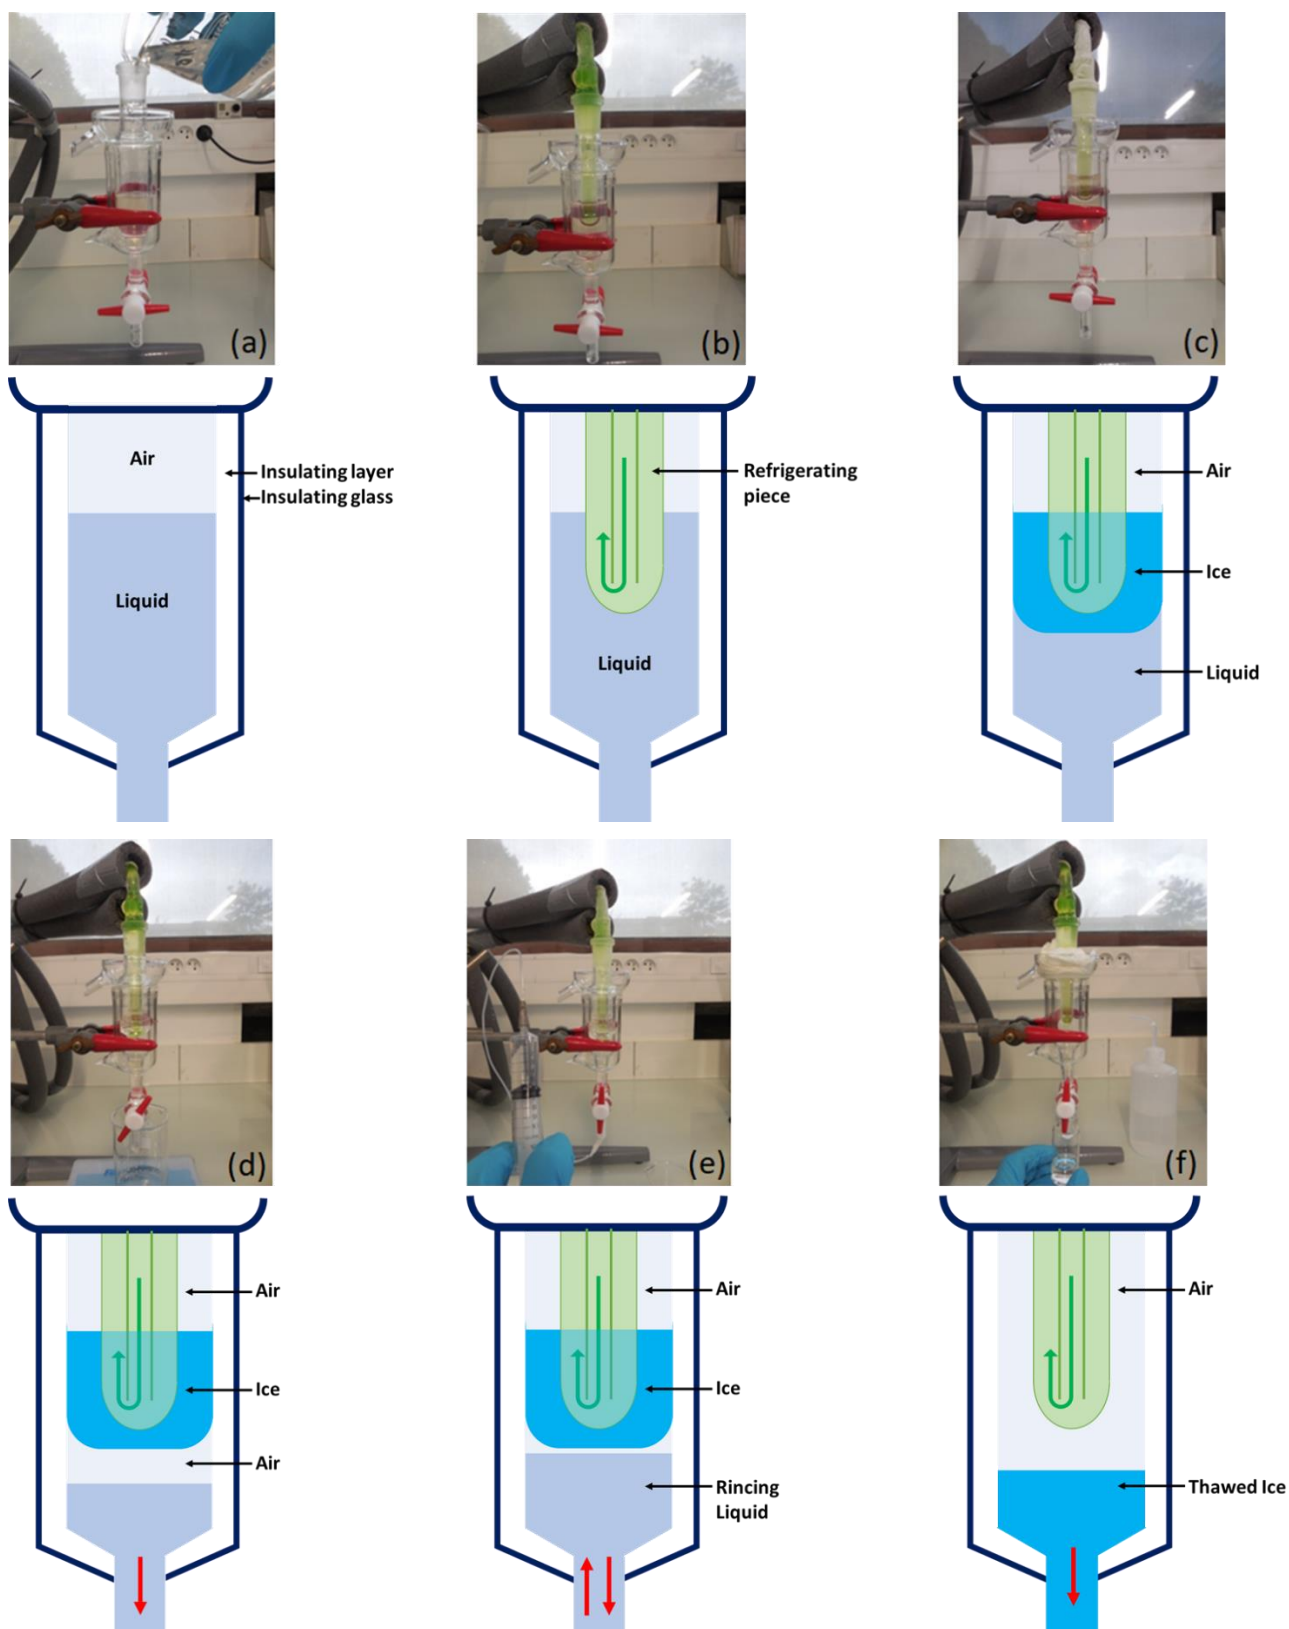

Figure S1: Steps of the progressive and partial freezing protocol in images (above) and corresponding diagrams (below): a) insertion of the solution in the freezing reactor, b) insertion of the cold finger, c) solidification of the liquid, d) recovery of the liquid phase, e) rinsing of the bottom of the vessel, f) recovery of thawed ice.

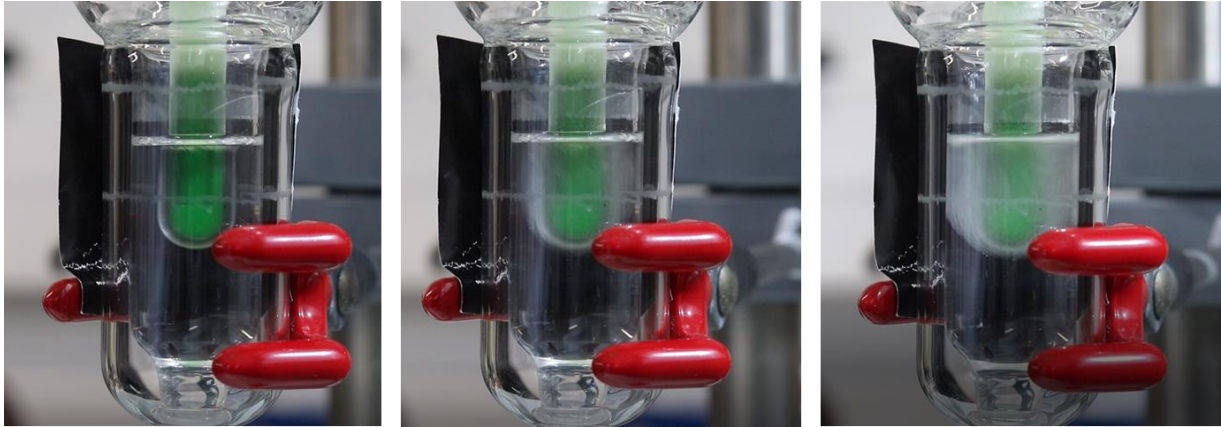

Figure S2: Examples of time-lapse photography, used to calculate speed and shape of freezing at 0 minutes, approximately 15 minutes and 40 minutes ( $35 \text{ g kg}^{-1} \text{ NaCl}$ )

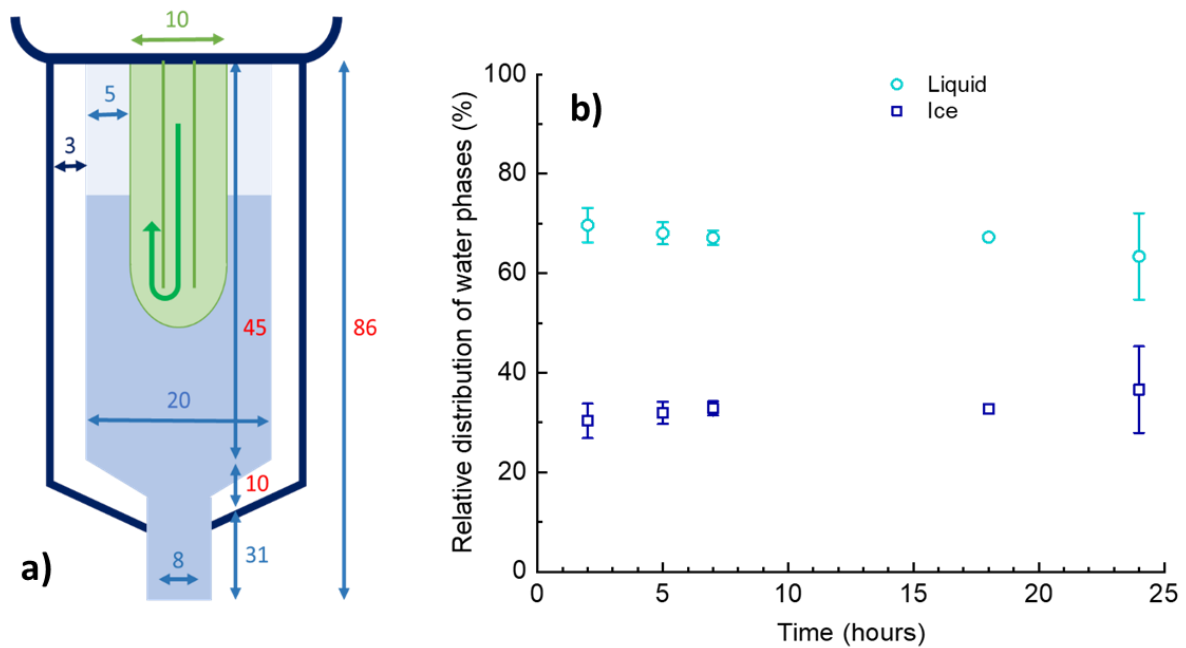

Figure S3: a) Dimensions of the system in mm (not to scale). From the exterior to the interior: the insulating layer of glass (dark blue), the inner vessel containing liquid (blue) and air (light blue), the refrigerating piece (green) with the direction of flow of the cooling liquid (bright green). Numbers in red represent dimensions that differed between the duplicate systems, with 86, 45 and 10 mm corresponding to 90, 52 and 7 mm, respectively. b) Evolution of the relative proportion of liquid and solid phases (m/m) for the  $35 \text{ g kg}^{-1} \text{ NaCl}$  solution.

Table 2: Summary of mass of initial solution ( $M_{\text{Init}}$ ), liquid ( $M_{\text{Liq}}$ ) and ice ( $M_{\text{Ice}}$ ) solutions recovered from the freezing reactor, losses of liquid or NaCl recovered, SA or particle concentrations measured in the initial solution ( $C_{\text{Init}}$ ), and in the Liquid ( $C_{\text{Liq}}$ ) and Ice ( $C_{\text{Ice}}$ ) solutions recovered from the freezing reactor; and proportion of initial SA or particle masses recovered in liquid and in ice. Since SA is very stable when frozen in NaCl (mass balance of  $-1 \pm 4\%$ ), for mixtures containing plastics and SA in NaCl, for simplicity we only showed the concentrations and mass balances of particles. For nPSL-200 and nPS-360 with NaCl and SA, concentrations in ice are the average of ice recovered in the two duplicate experiments.

|                 | Freezing duration<br>(hours) | Mass of solution (g) |        |      |        | NaCl Losses | Alginate Concentration (mg kg <sup>-1</sup> ) |        |       | Distribution of Initial Alginate Mass between |     |        |
|-----------------|------------------------------|----------------------|--------|------|--------|-------------|-----------------------------------------------|--------|-------|-----------------------------------------------|-----|--------|
|                 |                              | Initial              | Liquid | Ice  | Losses |             | Initial                                       | Liquid | Ice   | Liquid                                        | Ice | Losses |
| SA              | 2                            | 12.04                | 6.09   | 5.93 | 0%     |             | 21.49                                         | 31.57  | 11.20 | 74%                                           | 26% | 0%     |
|                 | 2                            | 12.01                | 5.50   | 6.75 | -2%    |             | 21.49                                         | 30.45  | 9.13  | 65%                                           | 24% | 11%    |
|                 | 5                            | 12.01                | 5.75   | 6.08 | 1%     |             | 21.70                                         | 31.78  | 3.87  | 70%                                           | 9%  | 21%    |
|                 | 5                            | 12.03                | 6.13   | 6.11 | -2%    |             | 21.70                                         | 30.49  | 7.83  | 72%                                           | 18% | 10%    |
|                 | 7                            | 12.03                | 5.38   | 6.82 | -1%    |             | 28.71                                         | 50.04  | 9.64  | 78%                                           | 19% | 3%     |
|                 | 7                            | 12.03                | 3.57   | 7.92 | 5%     |             | 28.71                                         | 48.99  | 12.69 | 51%                                           | 29% | 20%    |
|                 | 24                           | 12.02                | 4.82   | 6.63 | 5%     |             | 20.67                                         | 29.82  | 6.14  | 58%                                           | 16% | 26%    |
|                 | 24                           | 12.04                | 3.95   | 7.34 | 6%     |             | 20.67                                         | 49.26  | 6.56  | 78%                                           | 19% | 2%     |
| SA + NaCl       | 2                            | 12.02                | 7.22   | 4.20 | 5%     | 8%          | 20.38                                         | 25.29  | 11.65 | 74%                                           | 27% | -1%    |
|                 | 2                            | 12.00                | 8.00   | 3.65 | 3%     | 5%          | 20.38                                         | 24.52  | 11.84 | 80%                                           | 22% | -2%    |
|                 | 5                            | 12.05                | 7.69   | 3.97 | 3%     | 9%          | 25.03                                         | 28.98  | 15.37 | 74%                                           | 27% | -1%    |
|                 | 5                            | 12.01                | 7.59   | 4.09 | 3%     | 9%          | 25.03                                         | 31.36  | 16.19 | 79%                                           | 28% | -7%    |
|                 | 7                            | 12.01                | 8.22   | 4.21 | -3%    | 3%          | 25.54                                         | 26.57  | 12.42 | 71%                                           | 24% | 5%     |
|                 | 7                            | 12.00                | 7.83   | 3.94 | 2%     | 4%          | 25.54                                         | 31.48  | 15.96 | 80%                                           | 26% | -6%    |
|                 | 24                           | 12.01                | 7.48   | 3.84 | 6%     | 9%          | 20.56                                         | 29.73  | 5.00  | 90%                                           | 9%  | 1%     |
|                 | 24                           | 12.00                | 7.87   | 3.54 | 5%     | 10%         | 20.56                                         | 27.40  | 5.69  | 87%                                           | 9%  | 3%     |
|                 | Freezing duration<br>(hours) | Mass of solution (g) |        |      |        | NaCl Losses | Particle Concentration (mg kg <sup>-1</sup> ) |        |       | Distribution of Initial Particle Mass between |     |        |
|                 |                              | Initial              | Liquid | Ice  | Losses |             | Initial                                       | Liquid | Ice   | Liquid                                        | Ice | Losses |
| nPSL-200        | 2                            | 12.00                | 6.29   | 4.71 | 8%     |             | 10.18                                         | 13.93  | 1.46  | 72%                                           | 6%  | 23%    |
|                 | 2                            | 12.00                | 4.23   | 5.13 | 22%    |             | 10.18                                         | 10.81  | 2.68  | 37%                                           | 32% | 31%    |
|                 | 5                            | 12.04                | 5.10   | 6.15 | 7%     |             | 10.90                                         | 14.43  | 1.74  | 56%                                           | 8%  | 36%    |
|                 | 5                            | 12.03                | 4.46   | 7.00 | 5%     |             | 10.90                                         | 14.99  | 1.61  | 51%                                           | 9%  | 40%    |
|                 | 7                            | 12.02                | 6.09   | 6.08 | -1%    |             | 10.95                                         | 13.75  | 1.38  | 64%                                           | 6%  | 30%    |
|                 | 7                            | 12.02                | 5.17   | 6.39 | 4%     |             | 10.95                                         | 14.70  | 1.35  | 58%                                           | 7%  | 36%    |
|                 | 24                           | 12.02                | 6.29   | 6.01 | -2%    |             | 14.08                                         | 18.33  | 2.44  | 68%                                           | 9%  | 23%    |
|                 | 24                           | 12.03                | 6.12   | 5.51 | 3%     |             | 14.08                                         | 18.84  | 2.52  | 68%                                           | 8%  | 24%    |
| nPSL-200 + NaCl | 2                            | 10.31                | 8.17   | 1.99 | 2%     | 4%          | 9.16                                          | 9.77   | 3.19  | 85%                                           | 7%  | 9%     |
|                 | 2                            | 12.11                | 8.21   | 3.83 | 1%     | 4%          | 9.16                                          | 10.19  | 3.89  | 75%                                           | 13% | 11%    |
|                 | 5                            | 12.02                | 7.51   | 4.14 | 3%     | 6%          | 9.24                                          | 9.25   | 3.21  | 63%                                           | 12% | 25%    |
|                 | 5                            | 12.03                | 7.94   | 3.69 | 3%     | 12%         | 9.24                                          | 8.28   | 2.67  | 59%                                           | 9%  | 32%    |
|                 | 7                            | 12.01                | 7.60   | 3.70 | 6%     | 8%          | 8.01                                          | 8.25   | 2.75  | 65%                                           | 11% | 24%    |
|                 | 7                            | 12.01                | 8.26   | 3.42 | 3%     | 6%          | 8.01                                          | 7.54   | 3.01  | 65%                                           | 11% | 25%    |
|                 | 24                           | 12.02                | 7.39   | 3.88 | 6%     | 12%         | 8.76                                          | 5.74   | 1.63  | 40%                                           | 6%  | 54%    |
|                 | 24                           | 12.02                | 8.33   | 3.38 | 3%     | 9%          | 8.76                                          | 5.50   | 2.14  | 44%                                           | 7%  | 50%    |

Table 2: Continued

|                      | Freezing duration | Mass of solution (g) |        |      |        | NaCl Losses | Particle Concentration (mg kg <sup>-1</sup> ) |        |       | Distribution of Initial Particle Mass between |     |        |
|----------------------|-------------------|----------------------|--------|------|--------|-------------|-----------------------------------------------|--------|-------|-----------------------------------------------|-----|--------|
|                      | (hours)           | Initial              | Liquid | Ice  | Losses |             | Initial                                       | Liquid | Ice   | Liquid                                        | Ice | Losses |
| nPSL-200 + NaCl + SA | 2                 | 10.30                | 7.46   | 2.56 | 3%     | 11%         | 8.87                                          | 9.21   | 3.86  | 75%                                           | 11% | 14%    |
|                      | 2                 | 11.19                | 8.34   | 3.29 | -4%    | 5%          | 8.87                                          | 9.83   | 3.86  | 83%                                           | 13% | 5%     |
|                      | 5                 | 11.13                | 7.79   | 3.30 | 0%     | 7%          | 8.95                                          | 9.83   | 4.78  | 77%                                           | 16% | 7%     |
|                      | 5                 | 11.63                | 8.36   | 3.27 | 0%     | 5%          | 8.95                                          | 10.06  | 4.78  | 81%                                           | 15% | 4%     |
|                      | 7                 | 10.88                | 7.56   | 3.28 | 0%     | 8%          | 8.96                                          | 9.87   | 3.32  | 77%                                           | 11% | 12%    |
|                      | 7                 | 12.01                | 8.67   | 5.48 | -18%   | 3%          | 8.96                                          | 10.10  | 3.32  | 81%                                           | 17% | 2%     |
|                      | 24                | 12.59                | 7.72   | 4.12 | 6%     | 15%         | 8.71                                          | 10.28  | 2.41  | 72%                                           | 9%  | 19%    |
|                      | 24                | 11.15                | 7.51   | 3.38 | 2%     | 6%          | 8.71                                          | 10.79  | 2.41  | 83%                                           | 8%  | 8%     |
| nPS-360 + NaCl + SA  | 2                 | 11.08                | 7.58   | 3.23 | 2%     | 11%         | 8.78                                          | 10.04  | 5.39  | 78%                                           | 18% | 4%     |
|                      | 2                 | 11.85                | 7.79   | 3.64 | 4%     | 10%         | 8.78                                          | 10.01  | 5.39  | 75%                                           | 19% | 6%     |
|                      | 5                 | 11.34                | 8.20   | 5.16 | -18%   | 6%          | 10.25                                         | 10.81  | 3.79  | 76%                                           | 17% | 7%     |
|                      | 5                 | 10.80                | 8.66   | 2.66 | -5%    | 6%          | 10.25                                         | 10.62  | 3.79  | 83%                                           | 9%  | 8%     |
|                      | 7                 | 11.51                | 7.88   | 3.52 | 1%     | 8%          | 10.93                                         | 12.28  | 5.18  | 77%                                           | 14% | 9%     |
|                      | 7                 | 12.27                | 8.01   | 4.14 | 1%     | 8%          | 10.93                                         | 12.59  | 5.18  | 75%                                           | 16% | 9%     |
|                      | 24                | 9.94                 | 7.76   | 2.26 | -1%    | 1%          | 10.68                                         | 12.62  | 1.00  | 92%                                           | 2%  | 6%     |
|                      | 24                | 10.76                | 7.65   | 2.56 | 5%     | 14%         | 10.68                                         | 12.78  | 1.00  | 85%                                           | 2%  | 13%    |
| nPSL-350 + NaCl + SA | 2                 | 12.04                | 6.96   | 4.21 | 7%     | 11%         | 9.73                                          | 11.17  | 5.78  | 66%                                           | 21% | 13%    |
|                      | 2                 | 12.03                | 8.00   | 3.43 | 5%     | 7%          | 9.73                                          | 10.92  | 5.12  | 75%                                           | 15% | 10%    |
|                      | 5                 | 12.05                | 7.36   | 4.29 | 3%     | 6%          | 9.64                                          | 11.30  | 4.36  | 72%                                           | 16% | 12%    |
|                      | 5                 | 12.02                | 7.99   | 3.83 | 2%     | 4%          | 9.64                                          | 10.92  | 3.62  | 75%                                           | 12% | 13%    |
|                      | 7                 | 12.03                | 7.44   | 4.05 | 4%     | 9%          | 9.39                                          | 11.21  | 3.78  | 74%                                           | 14% | 13%    |
|                      | 7                 | 12.01                | 7.86   | 3.84 | 3%     | 6%          | 9.39                                          | 10.72  | 3.37  | 75%                                           | 11% | 14%    |
|                      | 24                | 12.02                | 7.78   | 3.76 | 4%     | 10%         | 9.60                                          | 12.40  | 3.71  | 84%                                           | 12% | 4%     |
|                      | 24                | 12.03                | 8.22   | 3.45 | 3%     | 9%          | 9.60                                          | 11.53  | 3.33  | 82%                                           | 10% | 8%     |
| μPS + NaCl + SA      | 2                 | 12.00                | 7.93   | 3.77 | 3%     | 8%          | 4351                                          | 756    | 10396 | 11%                                           | 75% | 14%    |
|                      | 2                 | 12.00                | 8.28   | 3.38 | 3%     | 7%          | 4382                                          | 1063   | 9446  | 17%                                           | 61% | 23%    |
|                      | 5                 | 12.01                | 8.33   | 4.25 | -5%    | 5%          | 4075                                          | 712    | 8016  | 12%                                           | 70% | 18%    |
|                      | 5                 | 12.01                | 8.83   | 3.67 | -4%    | -1%         | 4103                                          | 862    | 10948 | 15%                                           | 82% | 3%     |
|                      | 7                 | 12.02                | 8.09   | 3.40 | 4%     | 14%         | 4141                                          | 1065   | 9037  | 17%                                           | 62% | 21%    |
|                      | 7                 | 12.00                | 7.91   | 4.43 | -3%    | 12%         | 4340                                          | 1545   | 8952  | 23%                                           | 76% | 0%     |
|                      | 24                | 12.03                | 7.23   | 4.32 | 4%     | NA          | 4451                                          | 427    | 9859  | 6%                                            | 80% | 15%    |
|                      | 24                | 12.02                | 8.00   | 3.43 | 5%     | 6%          | 4443                                          | 707    | 11621 | 11%                                           | 75% | 15%    |



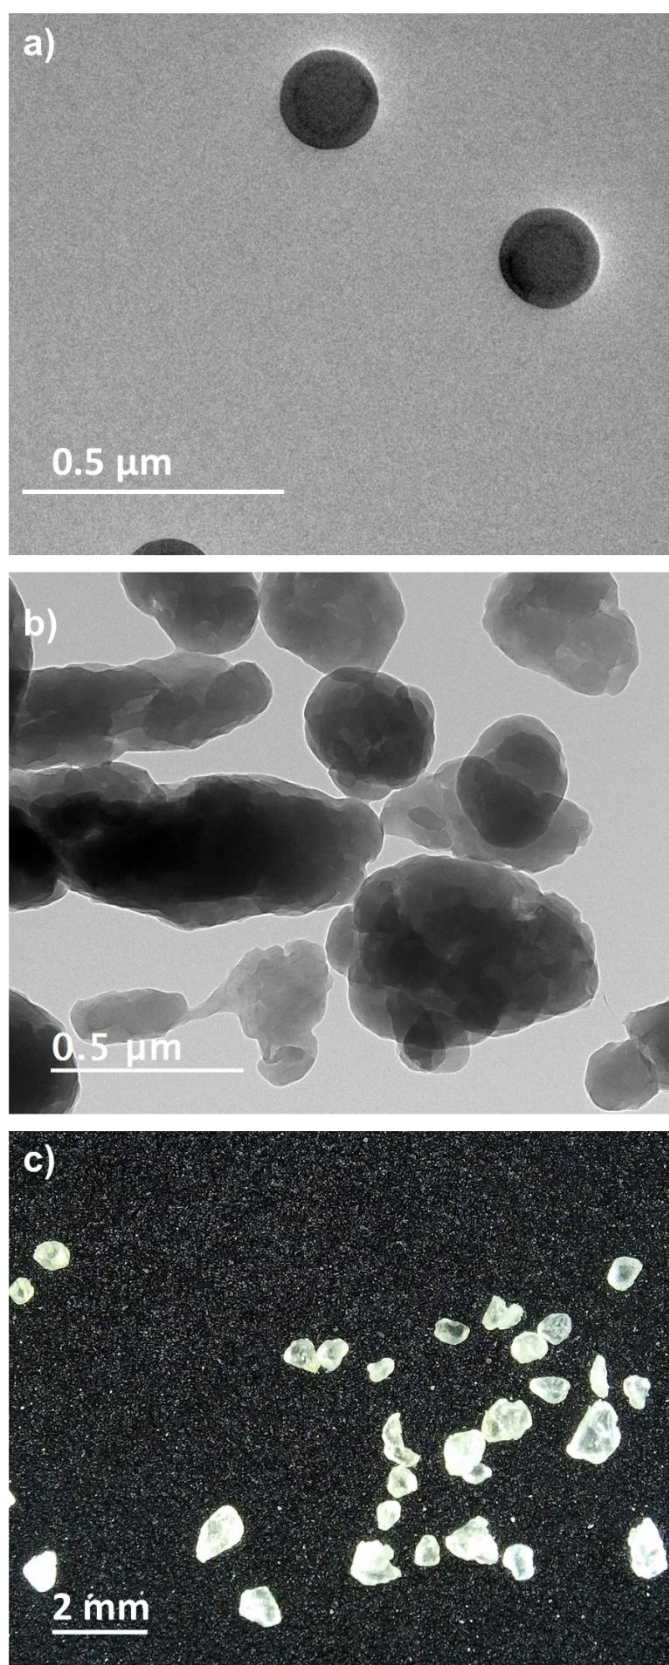

Figure S4: TEM images of a) nPSL-200 and b) nPS-360. c) Digital photography of  $\mu\text{PS}$ .

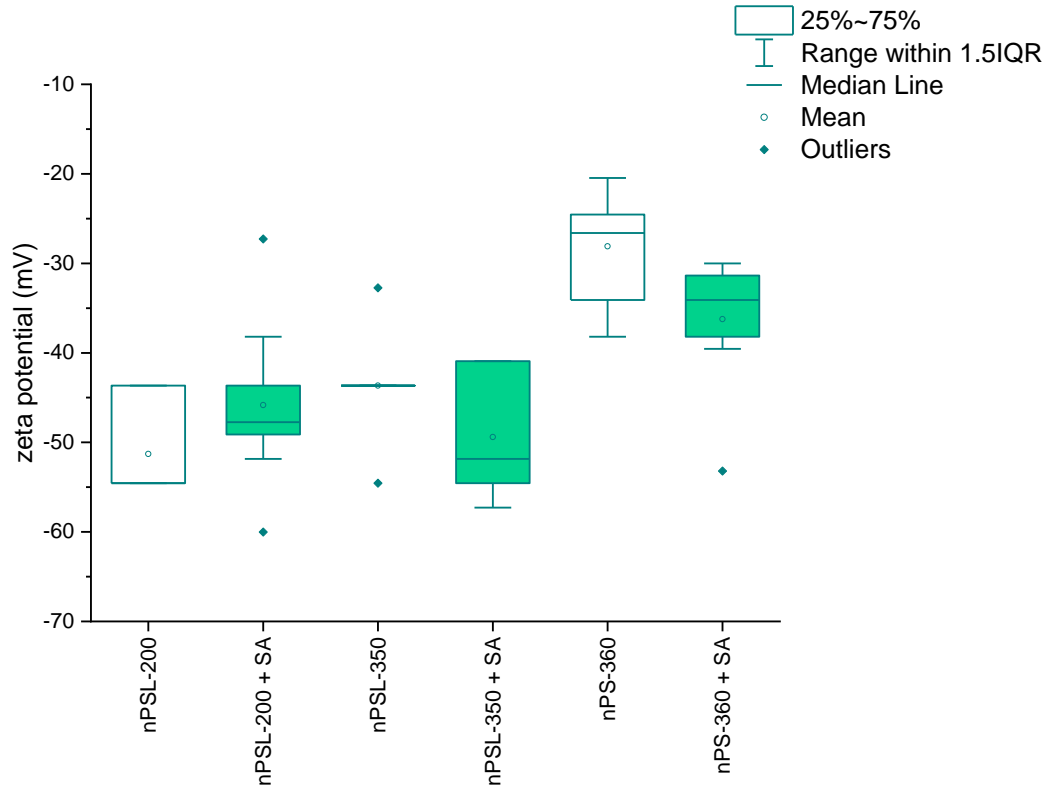

Figure S5: Zeta potential of  $10 \text{ mg kg}^{-1}$  of nanoplastic (nP) models in  $0.23 \text{ g kg}^{-1}$  NaCl, alone and with  $50 \text{ mg kg}^{-1}$  SA. Results are composed of 10 measurements in medium resolution mode.

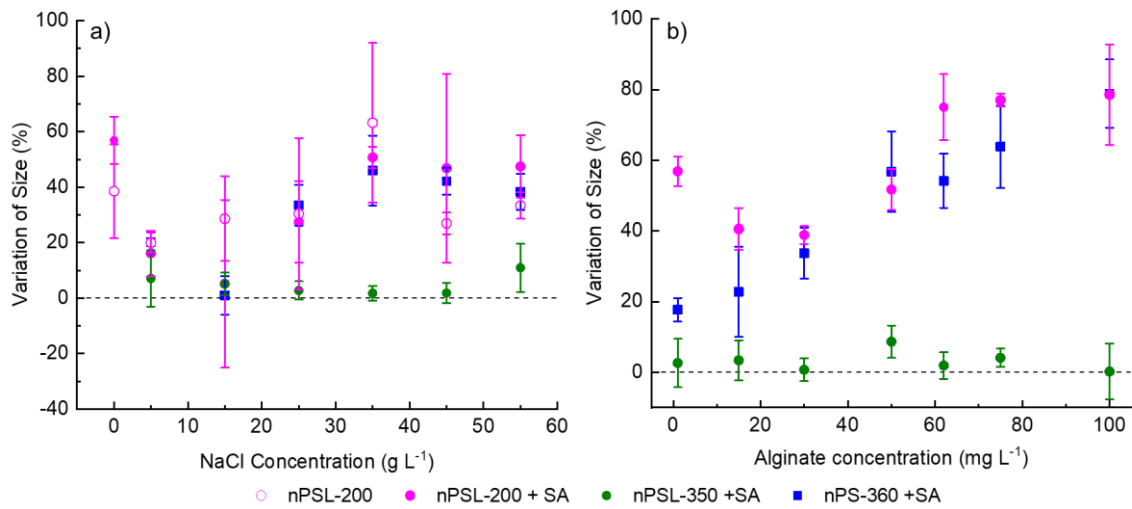

Figure S6: Variations of size of nanoplastics (nPs) after bulk freeze/thaw a) as a function of NaCl concentration (keeping SA at  $50 \text{ mg kg}^{-1}$ , if present) and b) as a function SA (keeping NaCl at  $35 \text{ g kg}^{-1}$  NaCl). Whether or not it has been purified, nPSL-350 does not form aggregates ( $\leq 10\% \text{ dzh}$ ) (data not shown).

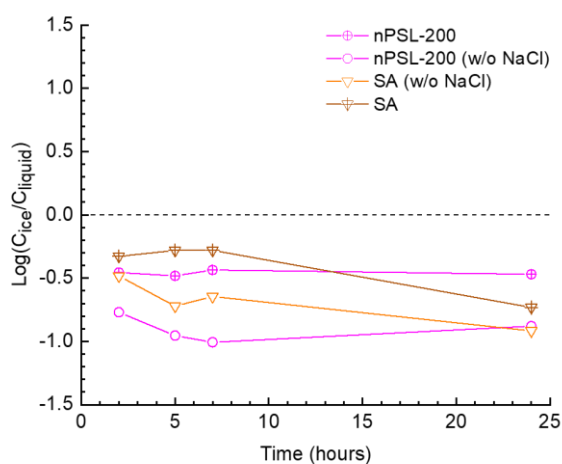

Figure S7: Logarithm of the partition coefficient between ice and liquid phase ( $C_{ice}/C_{liquid}$ ) of nanoplastic nPSL-200 and SA, dispersed in deionized water at pH 8 or NaCl 35 g kg<sup>-1</sup> pH 8, as a function of duration of the freezing experiment

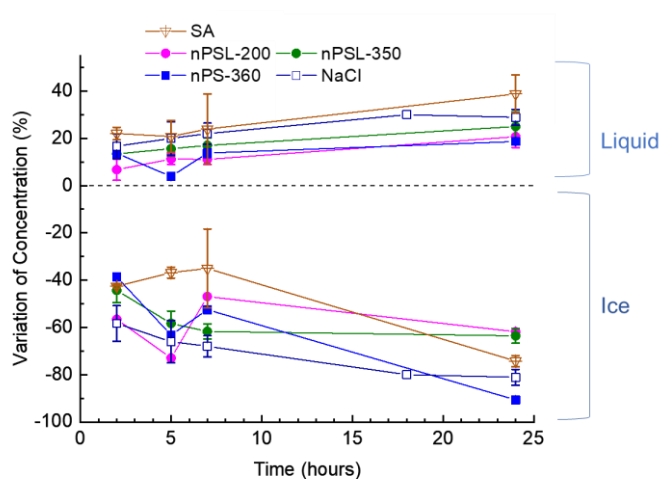

Figure S8: Variation of the concentrations of different species in liquid and ice, as a function of the duration of the freezing in the reactor. All experiments were conducted with 35 g kg<sup>-1</sup> NaCl and 50 mg kg<sup>-1</sup> SA at pH 8.

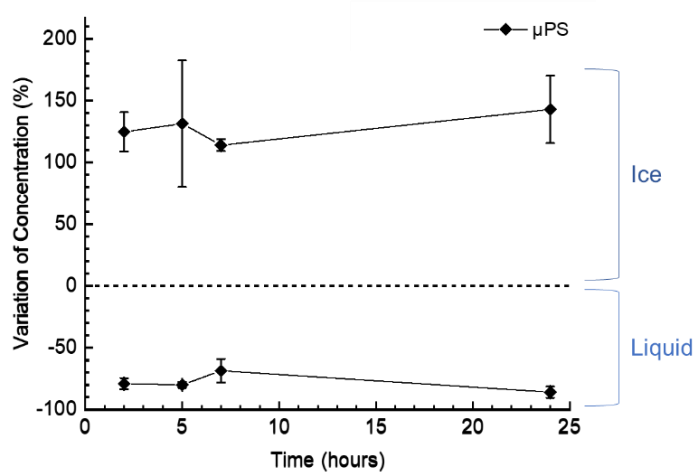

Figure S9: Variation of the concentration of polystyrene microplastics ( $\mu$ PS) dispersed in 35 g kg<sup>-1</sup> NaCl at pH 8, and recovered in liquid and ice, as a function of the duration of freezing in the reactor
